# Supplementary material for: Analysing Agricultural Diversification as a Risk Management Strategy with the Minimum Regret Model
Source: Preprints.org preprint supplement (doi:10.20944/preprints201901.0092.v1), 2019-01-10
Supplement: Supplementary file 1 [file supplementary]

## Sheet: Explanation
Worksheet	Description
SownArea	Sown area by year from Matsuda (2013)
Yield	Yields in local units from Matsuda (2013)
Price	Prices in local currency as provided by Matsuda (2013) with two imputed missing data points
Revenue	Revenue derived from Yield and Price worksheets
RevenueStandardized	Revenue converted to euro and corrected for inflation
Payoff	Payoff matrix derived from standardized revenue table (combining cotton and pigeonpea)
Utility	Expected utility calculation
AbsRegret	Absolute regret calculation
RelRegret	Relative regret calculation
MaxAbsRegret	Maximum absolute regret calculation
MaxRelRegret	Maximum relative regret calculation
Optimization can be done with the GRG Nonlinear Solving algorithm in the Solver plug-in.

## Sheet: SownArea
Year	Pigeonpea	Cotton	Sesame	OtherPulses	PigeonPeaCotton
2002	39	33.5	8	10.5	33.5
2003	27.5	17.5	13	2.5	17.5
2004	68.5	47	30.5	22	47
2005	67.3	50.5	25.7	20	50.5
2006	77.7	55.2	18.5	28.3	55.2
2007	89	58.5	26.2	35	58.5
2008	99.5	59	36.3	31.5	59
	Relative share ->		0.25143	0.23808	0.51049

## Sheet: Yield
Year	Pigeonpea (basket/acre)	Cotton (viss/acre)	Sesame (basket/acre)	OtherPulses
2002	0.7	5.8	2.1	1.7
2003	3.5	54.3	4.1	4
2004	6.1	50.5	2.2	7.3
2005	3.2	48.6	2.7	5.5
2006	7.3	27.3	1.6	10.5
2007	9.1	41.6	3.5	10.8
2008	4.6	33.6	3.1	9.1
Average	4.92857	37.3857	2.75714	6.98571
Average calculated only to check against Matsuda (2013); values coincide.

## Sheet: Price
Year	Pigeonpea (MMK/basket)	Cotton	Sesame (MMK/basket)	OtherPulses (MMK/viss)	Rice
2003	4000	80	8000	2560	2750
2004	6000	250	8000	3840	4000
2005	6500	300	10000	6000	6000
2006	7800	350	12000	5500	7000
2007	17000	700	15000	11500	12500
2008	16000	900	27000	10000	11000
2009	14000	400	30000	7500	11500
Other pulses, cells E2 and E3 are inferred by doing a linear regression of other pulses against pigeon pea, which are highly correlated (R2 = 0.98).
The regression model assumed an intercept through the origin: Price pulses = 0.64 * price pigeonpea + error

## Sheet: Revenue
	Pigeonpea (basket/acre)	Cotton (viss/acre)	Sesame (basket/acre)	OtherPulses	PigeonpeaCottonIntercropped
2003	2800	464	16800	4352	3264
2004	21000	13575	32800	15360	34575
2005	39650	15150	22000	43800	54800
2006	24960	17010	32400	30250	41970
2007	124100	19110	24000	120750	143210
2008	145600	37440	94500	108000	183040
2009	64400	13440	93000	68250	77840

## Sheet: RevenueStandardized
Year	Pigeonpea (MMK/basket)	Cotton	Sesame (MMK/basket)	OtherPulses (MMK/viss)	CottonPigeonPeaIntercrop
2003	25.6874	4.25677	154.124	39.9256	29.9442
2004	132.451	85.6199	206.875	96.8782	218.071
2005	166.72	63.7025	92.5053	184.17	230.422
2006	89.9584	61.3058	116.773	109.024	151.264
2007	250.471	38.5696	48.4391	243.709	289.04
2008	333.936	85.8693	216.738	247.7	419.806
2009	141.281	29.4847	204.023	149.727	170.765
1 US$ = 810 MMK; 1.39 US$ = 1.00 Euro (2009 prices)
2.47 acres = 1 hectare

## Sheet: Payoff
CottonPigeonpea	Sesame	OtherLegumes	MAX
29.9442	154.124	39.9256	154.124
218.071	206.875	96.8782	218.071
230.422	92.5053	184.17	230.422
151.264	116.773	109.024	151.264
289.04	48.4391	243.709	289.04
419.806	216.738	247.7	419.806
170.765	204.023	149.727	204.023
215.616	148.497	153.019

## Sheet: Utility
CottonPigeonpea	Sesame	OtherLegumes	Sum
0.74	0.02	0.24	1
159.556	2.96994	36.7246	199.25
Cell D3 is the maximum utility. The objective is to maximize this cell.
Cells A2:C2 are proportions and are changed by the optimization. They should be set to non-negative.
Cell D2 is the sum of the proportions. This value should be constrained in the optimization to be 1.

## Sheet: AbsRegret
CottonPigeonpea	Sesame	OtherLegumes	Sum
91.8934	0	27.4077	14232.8
0	0.223905	29.0862	859.081
0	2.75834	11.1006	192.071
0	0.689825	10.1376	117.233
0	4.81202	10.8794	246.222
0	4.06136	41.3054	2058.14
24.6109	0	13.0312	1416.93
0.74	0.02	0.24	52.2664
			1
Cell D9 is the absolute regret. The objective is to minimize this cell.
Cells A9:C9 are proportions and are changed by the optimization. They should be set to non-negative.
Cell D10 is the sum of the proportions. This value should be constrained in the optimization to be 1.

## Sheet: RelRegret
CottonPigeonpea	Sesame	OtherLegumes	Sum
60.8483	0	27.4077	0.327903
0	3.02271	29.0862	0.0216798
0	37.2376	11.1006	0.0440081
0	9.31264	10.1376	0.016534
0	64.9623	10.8794	0.0688493
0	54.8284	41.3054	0.0524391
16.2964	0	13.0312	0.020663
0.49	0.27	0.24	0.280835
			1
Cell D9 is the relative regret. The objective is to minimize this cell.
Cells A9:C9 are proportions and are changed by the optimization. They should be set to non-negative.
Cell D10 is the sum of the proportions. This value should be constrained in the optimization to be 1.

[truncated: 2 more sheets: MaxAbsRegret, MaxRelRegret]
